# Supplementary material for: Efficient virus-induced gene silencing in Hibiscus hamabo Sieb. et Zucc. using tobacco rattle virus
Source: PeerJ journal article supplement (doi:10.7717/peerj.7505), 2019-08-12

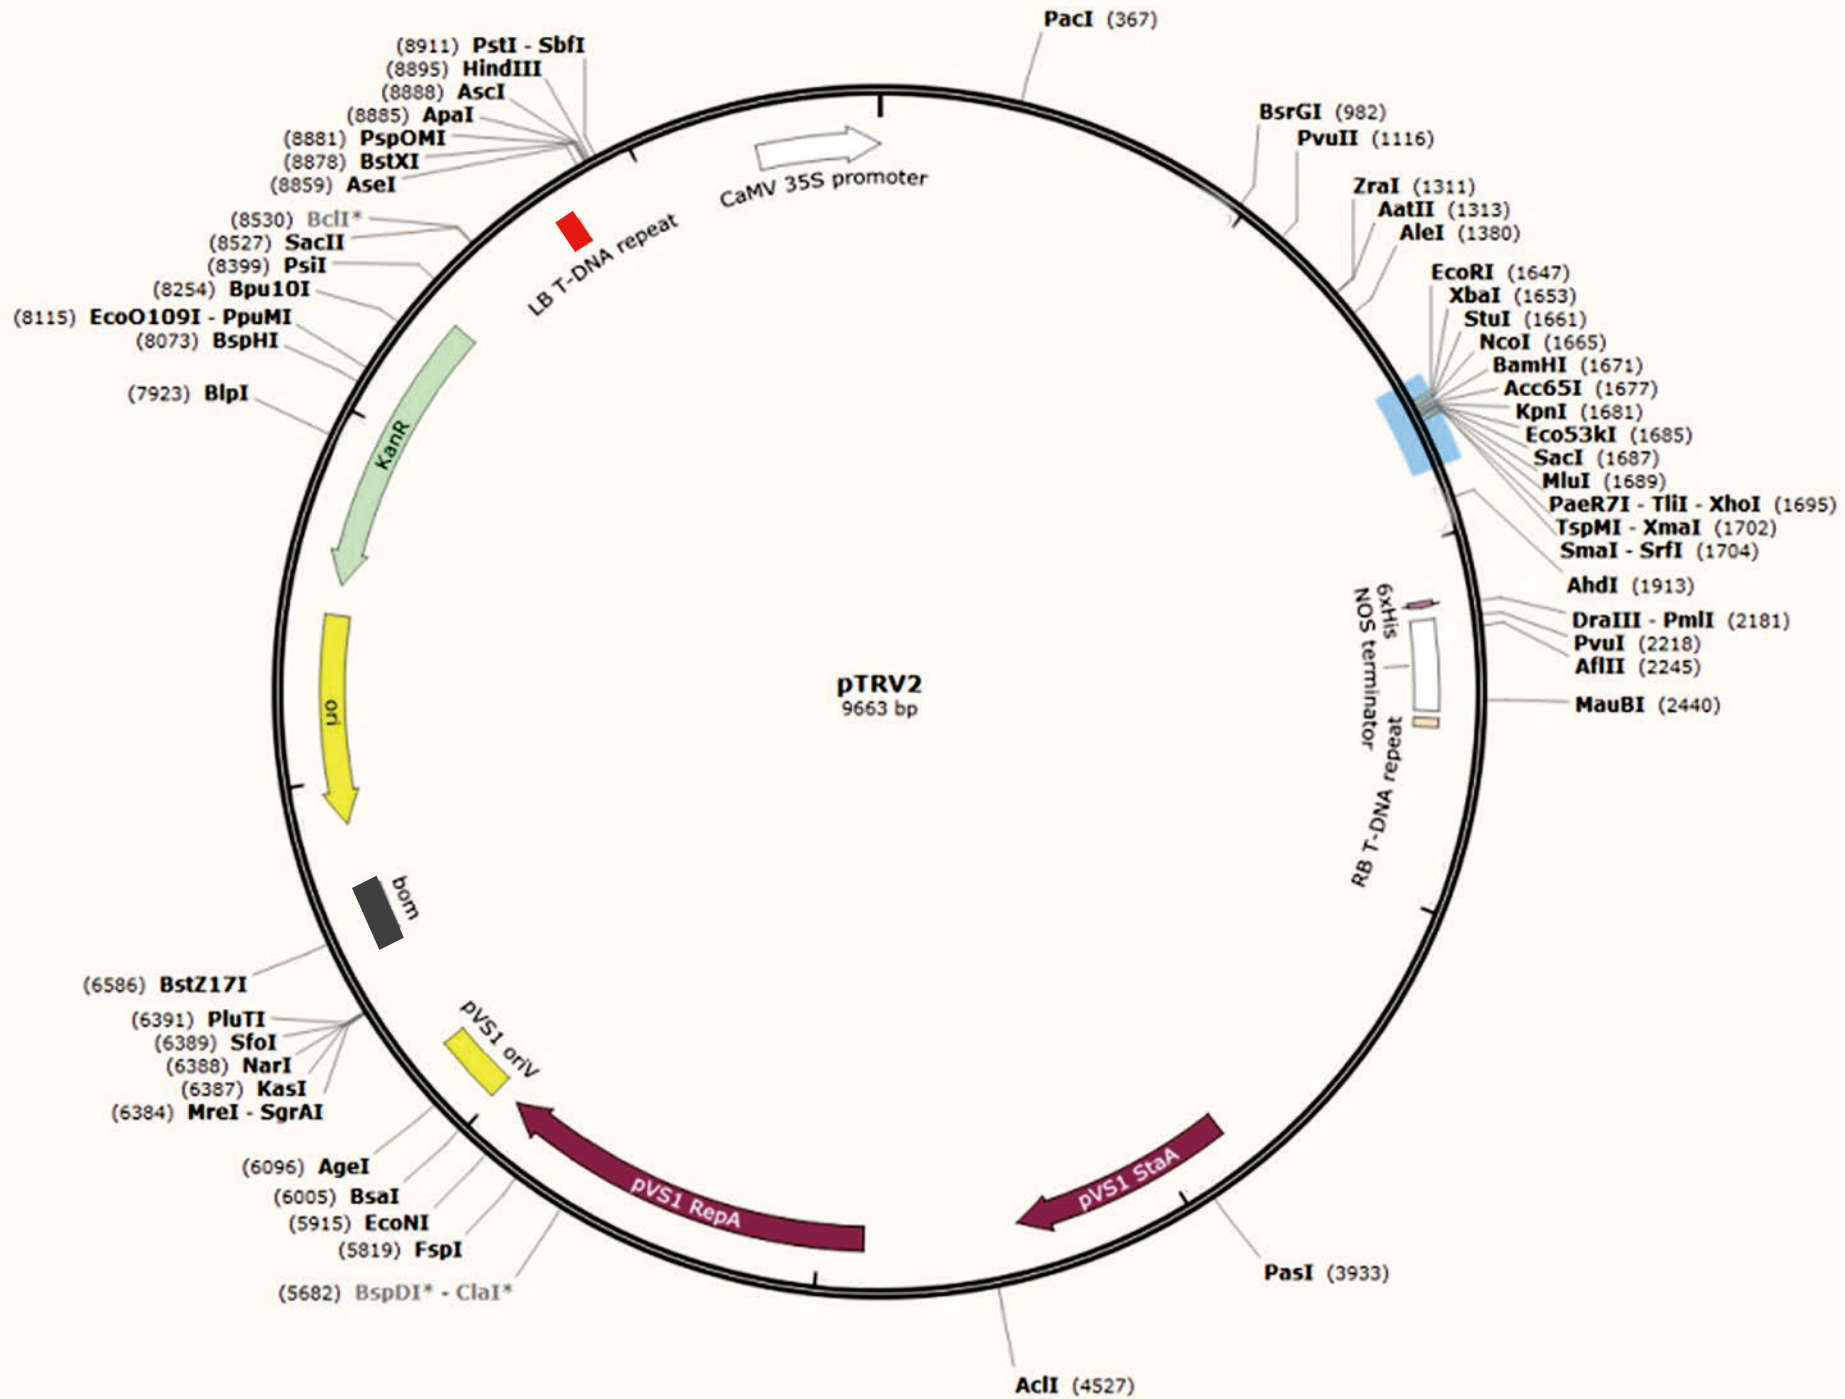

Supplement: Fig_S1.pdf [file Fig_S1.pdf]
