# Supplementary material for: Efficient virus-induced gene silencing in Hibiscus hamabo Sieb. et Zucc. using tobacco rattle virus
Source: PeerJ journal article supplement (doi:10.7717/peerj.7505), 2019-08-12

A

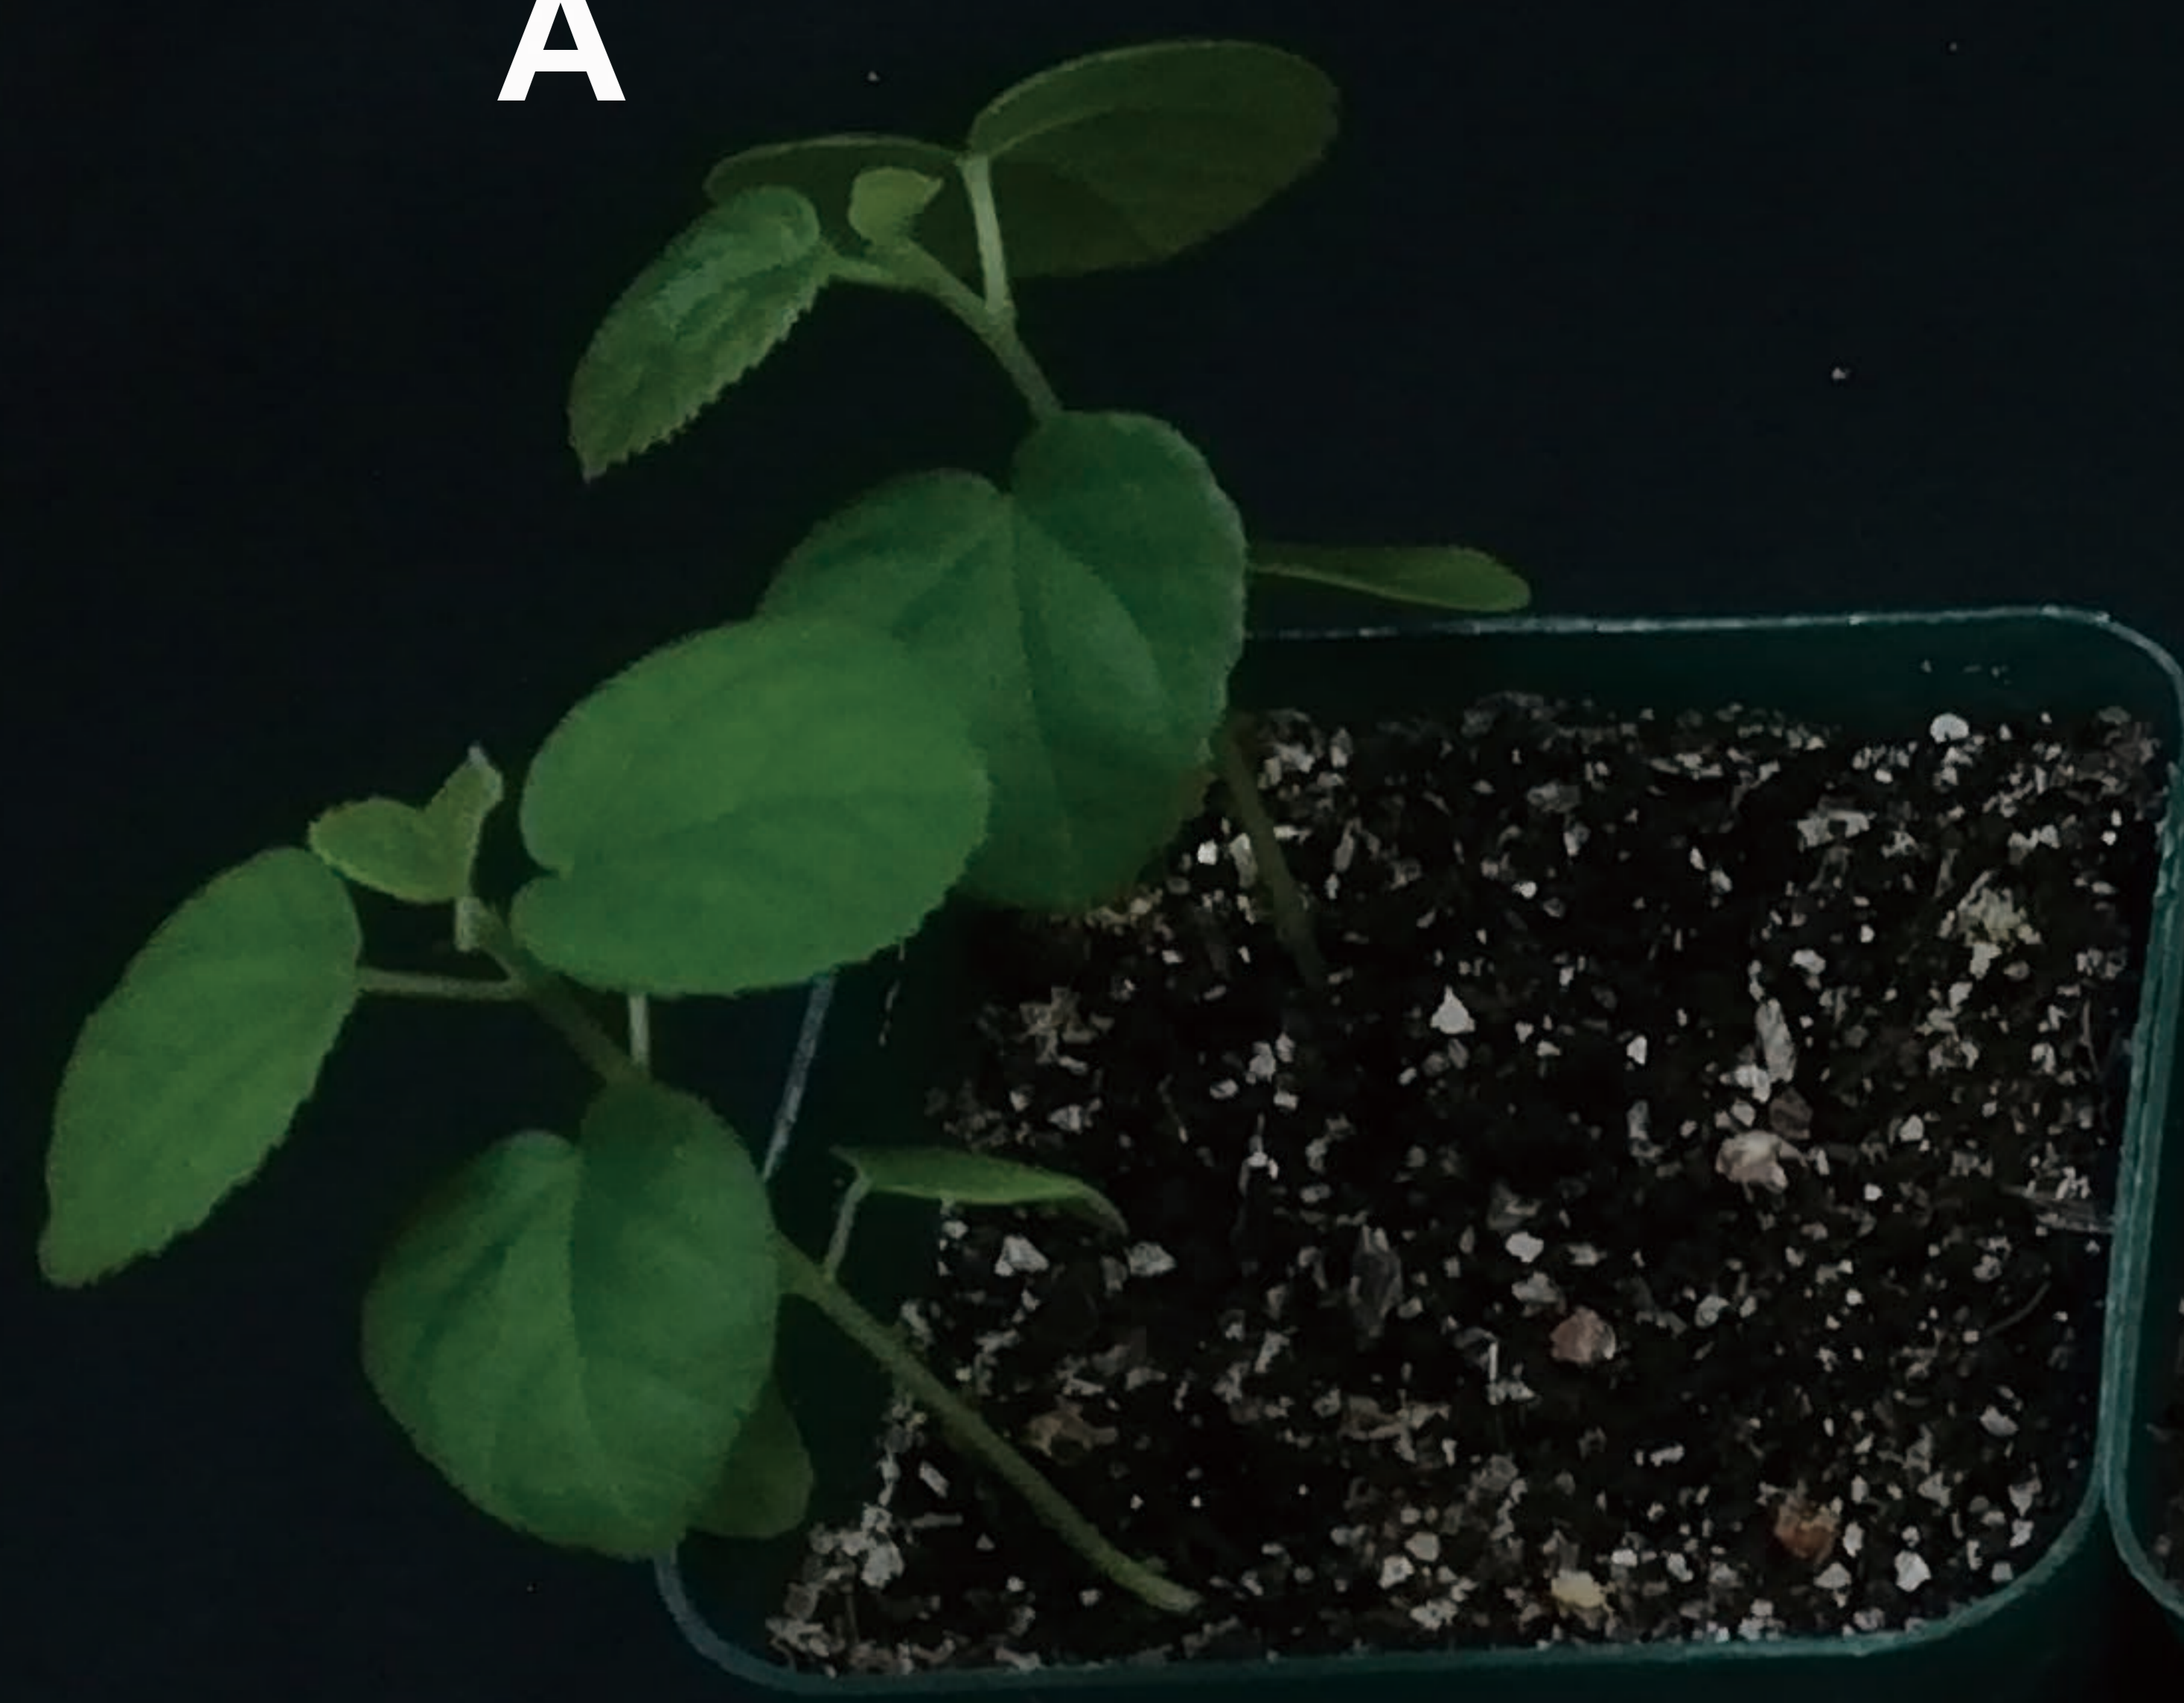

ck

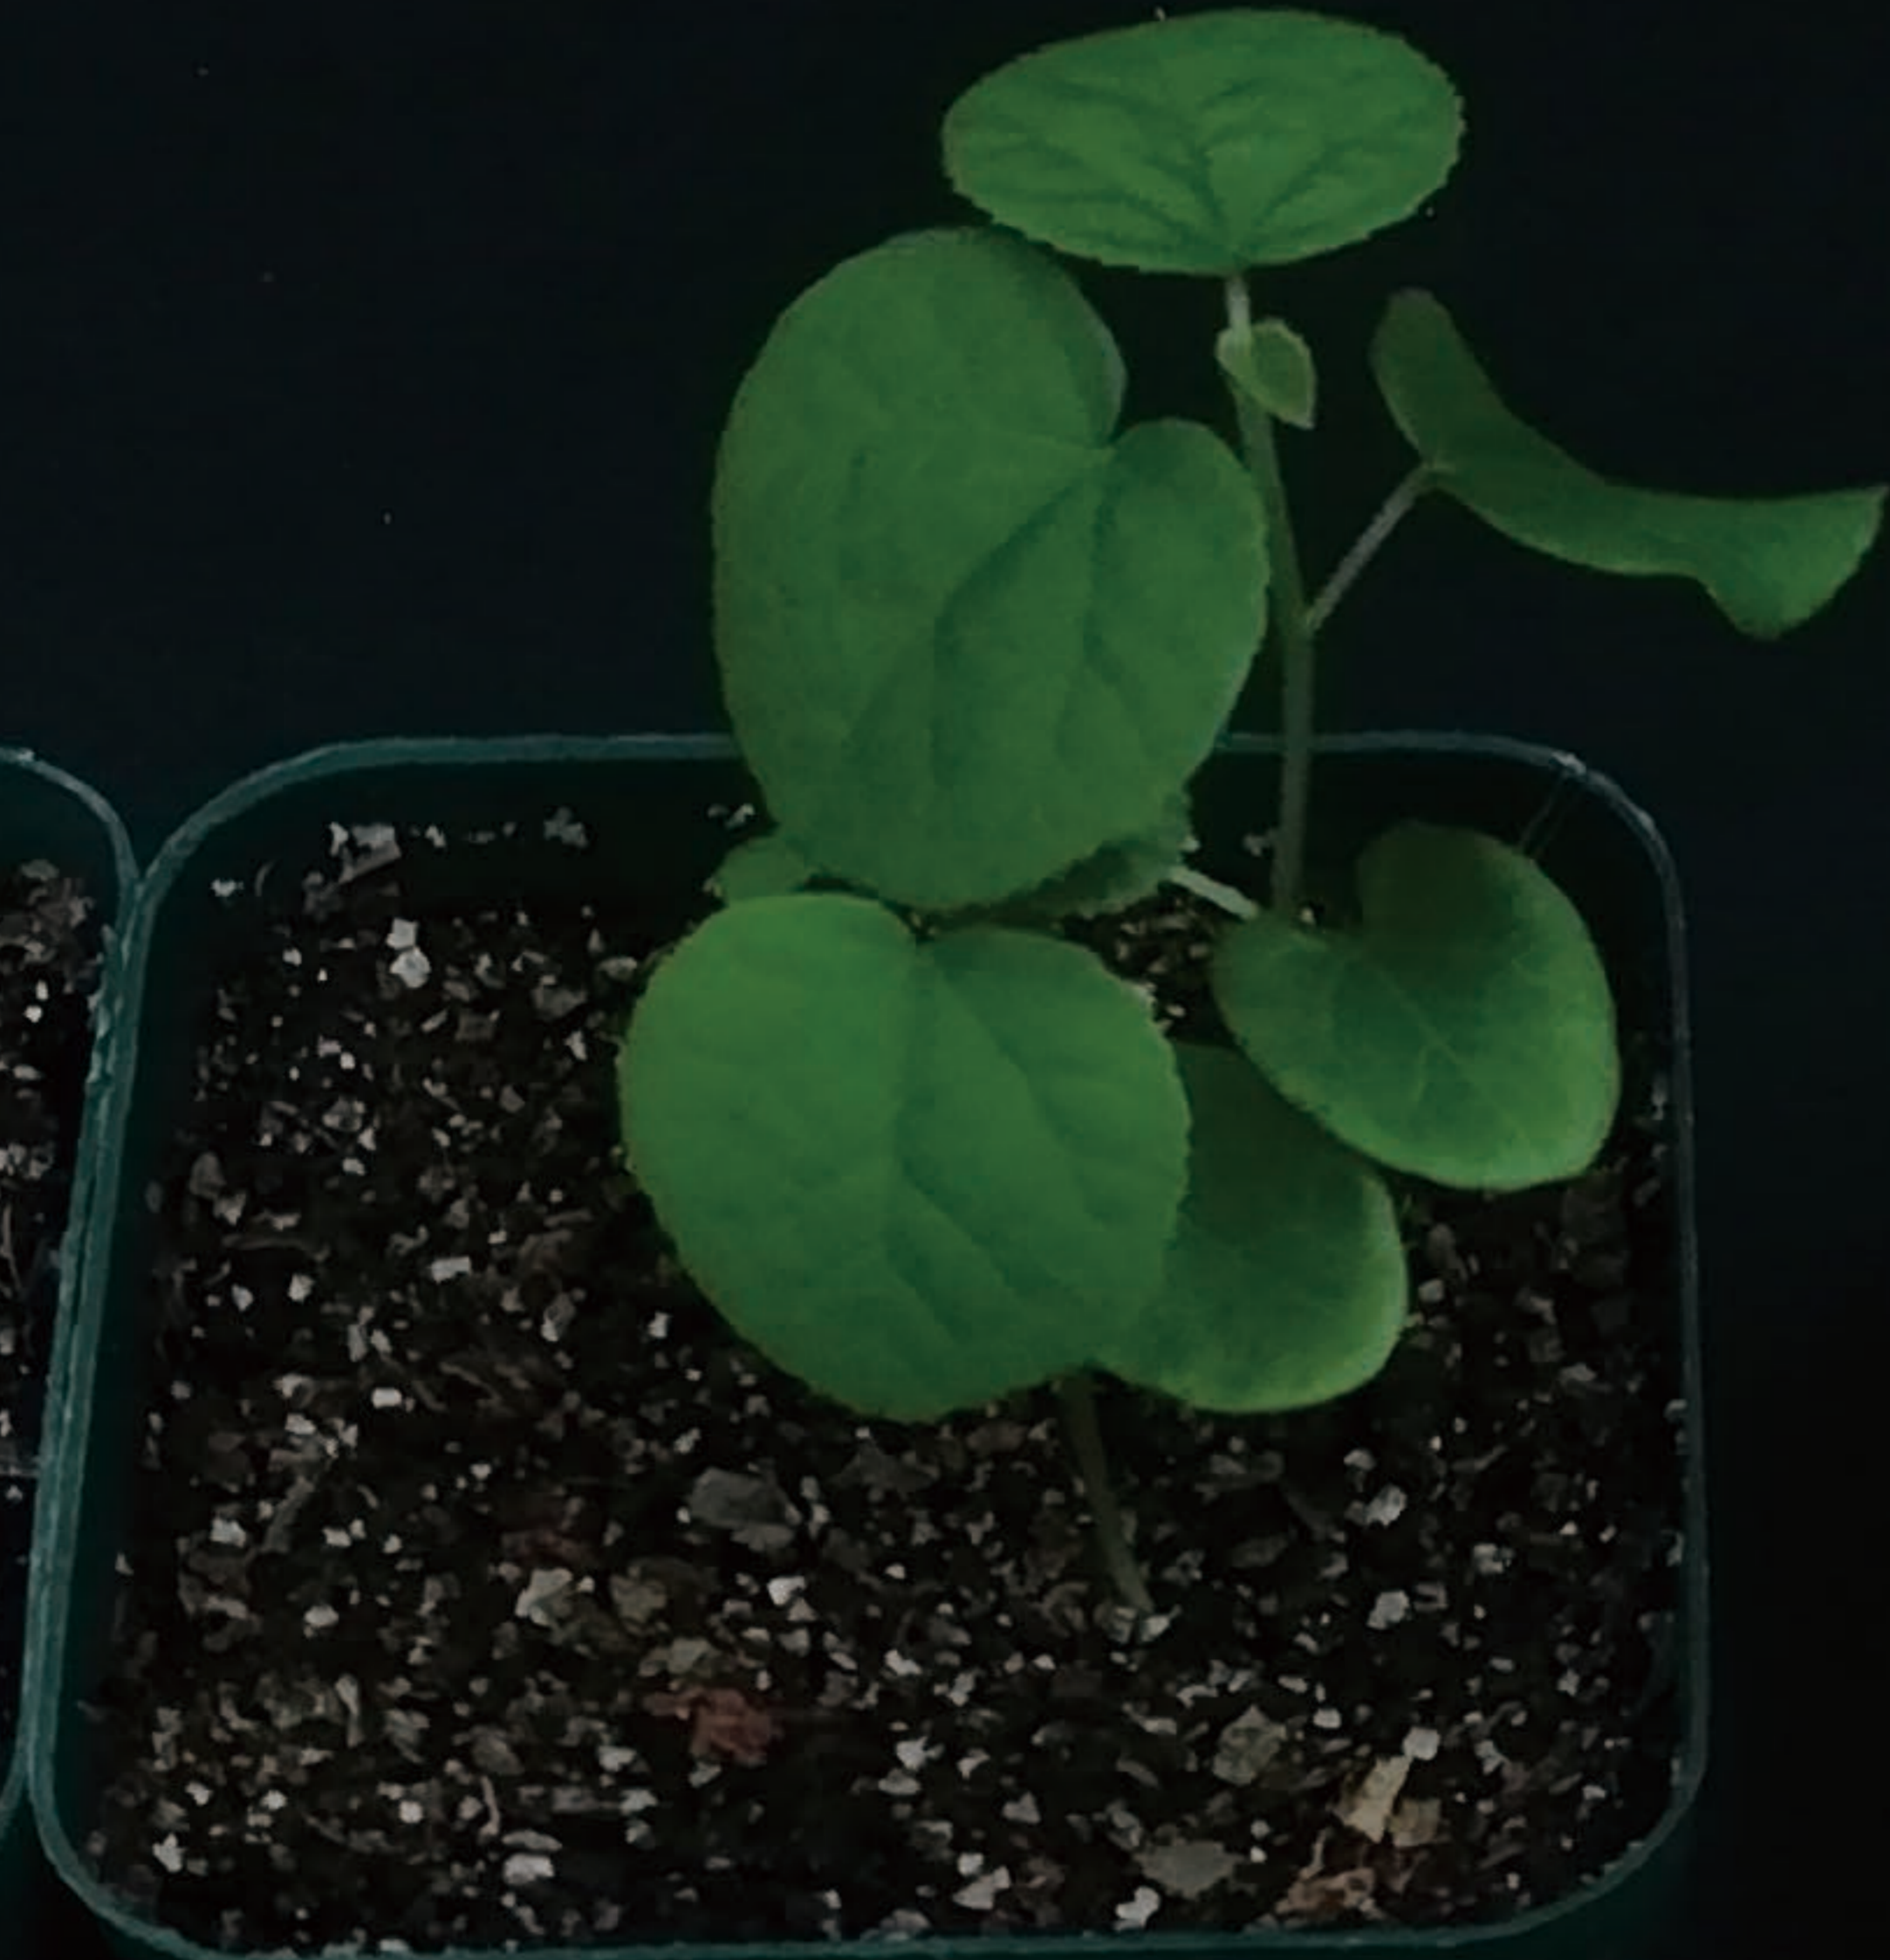

ck

B

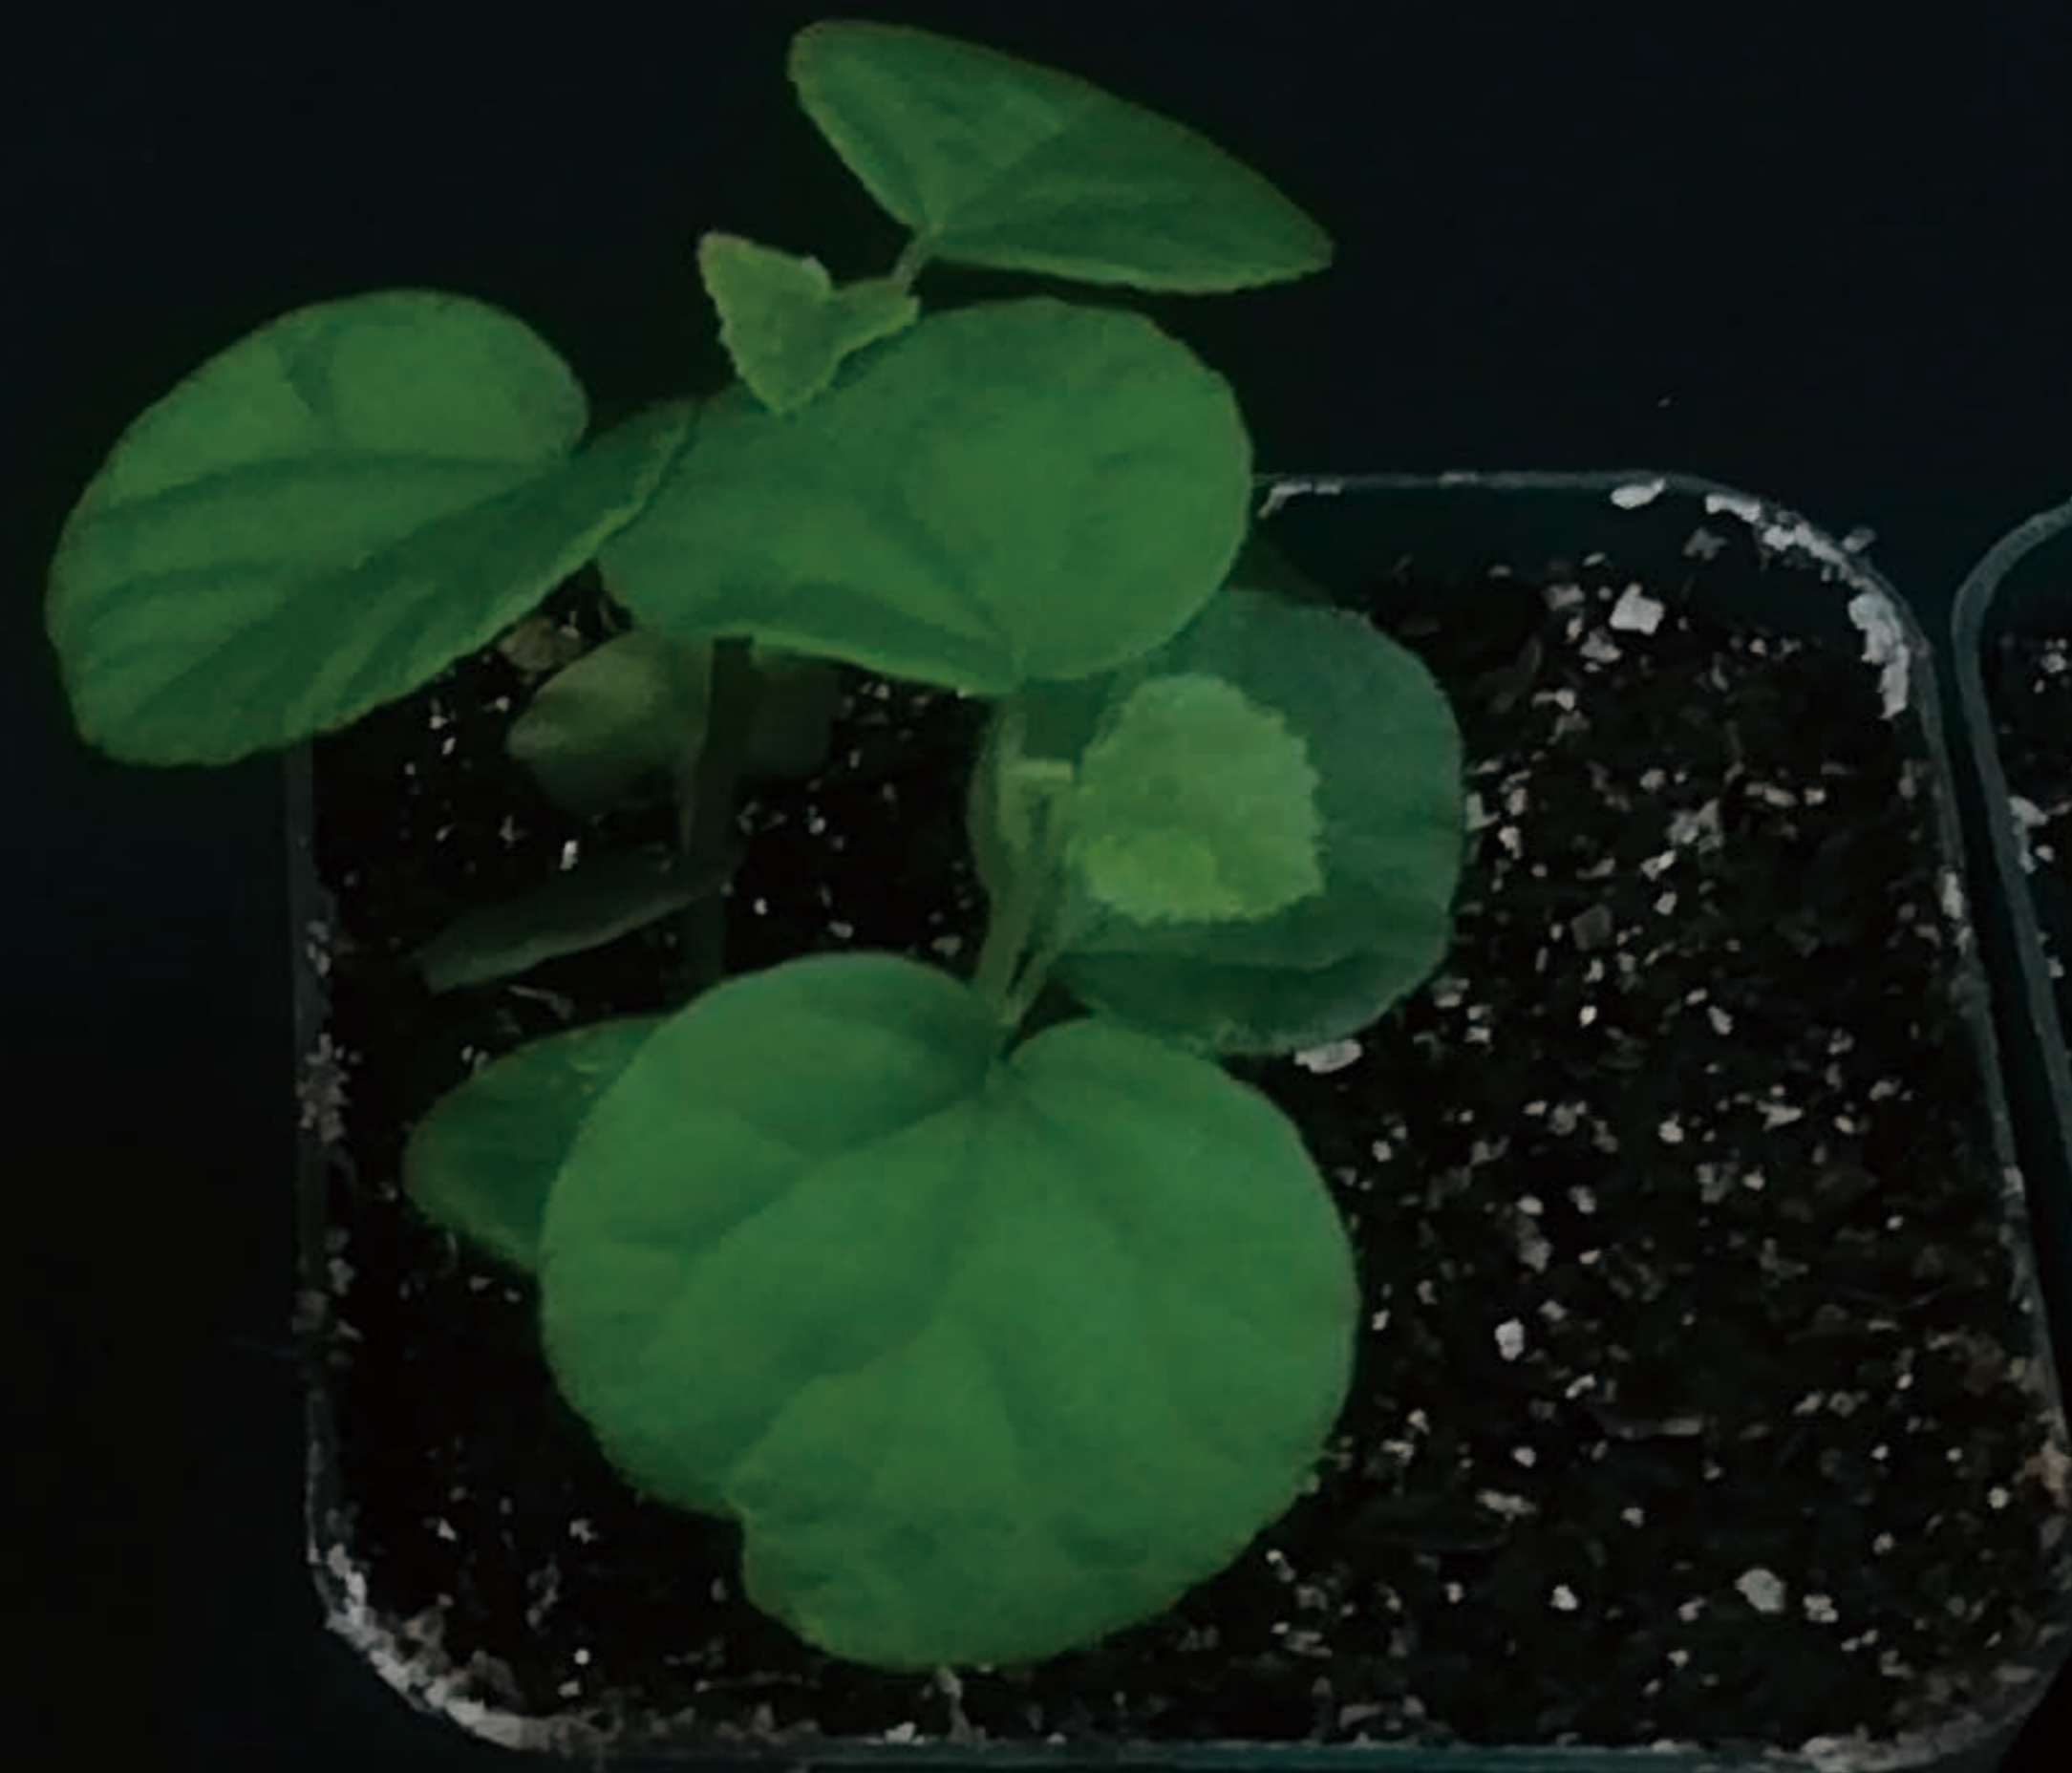

TRV2

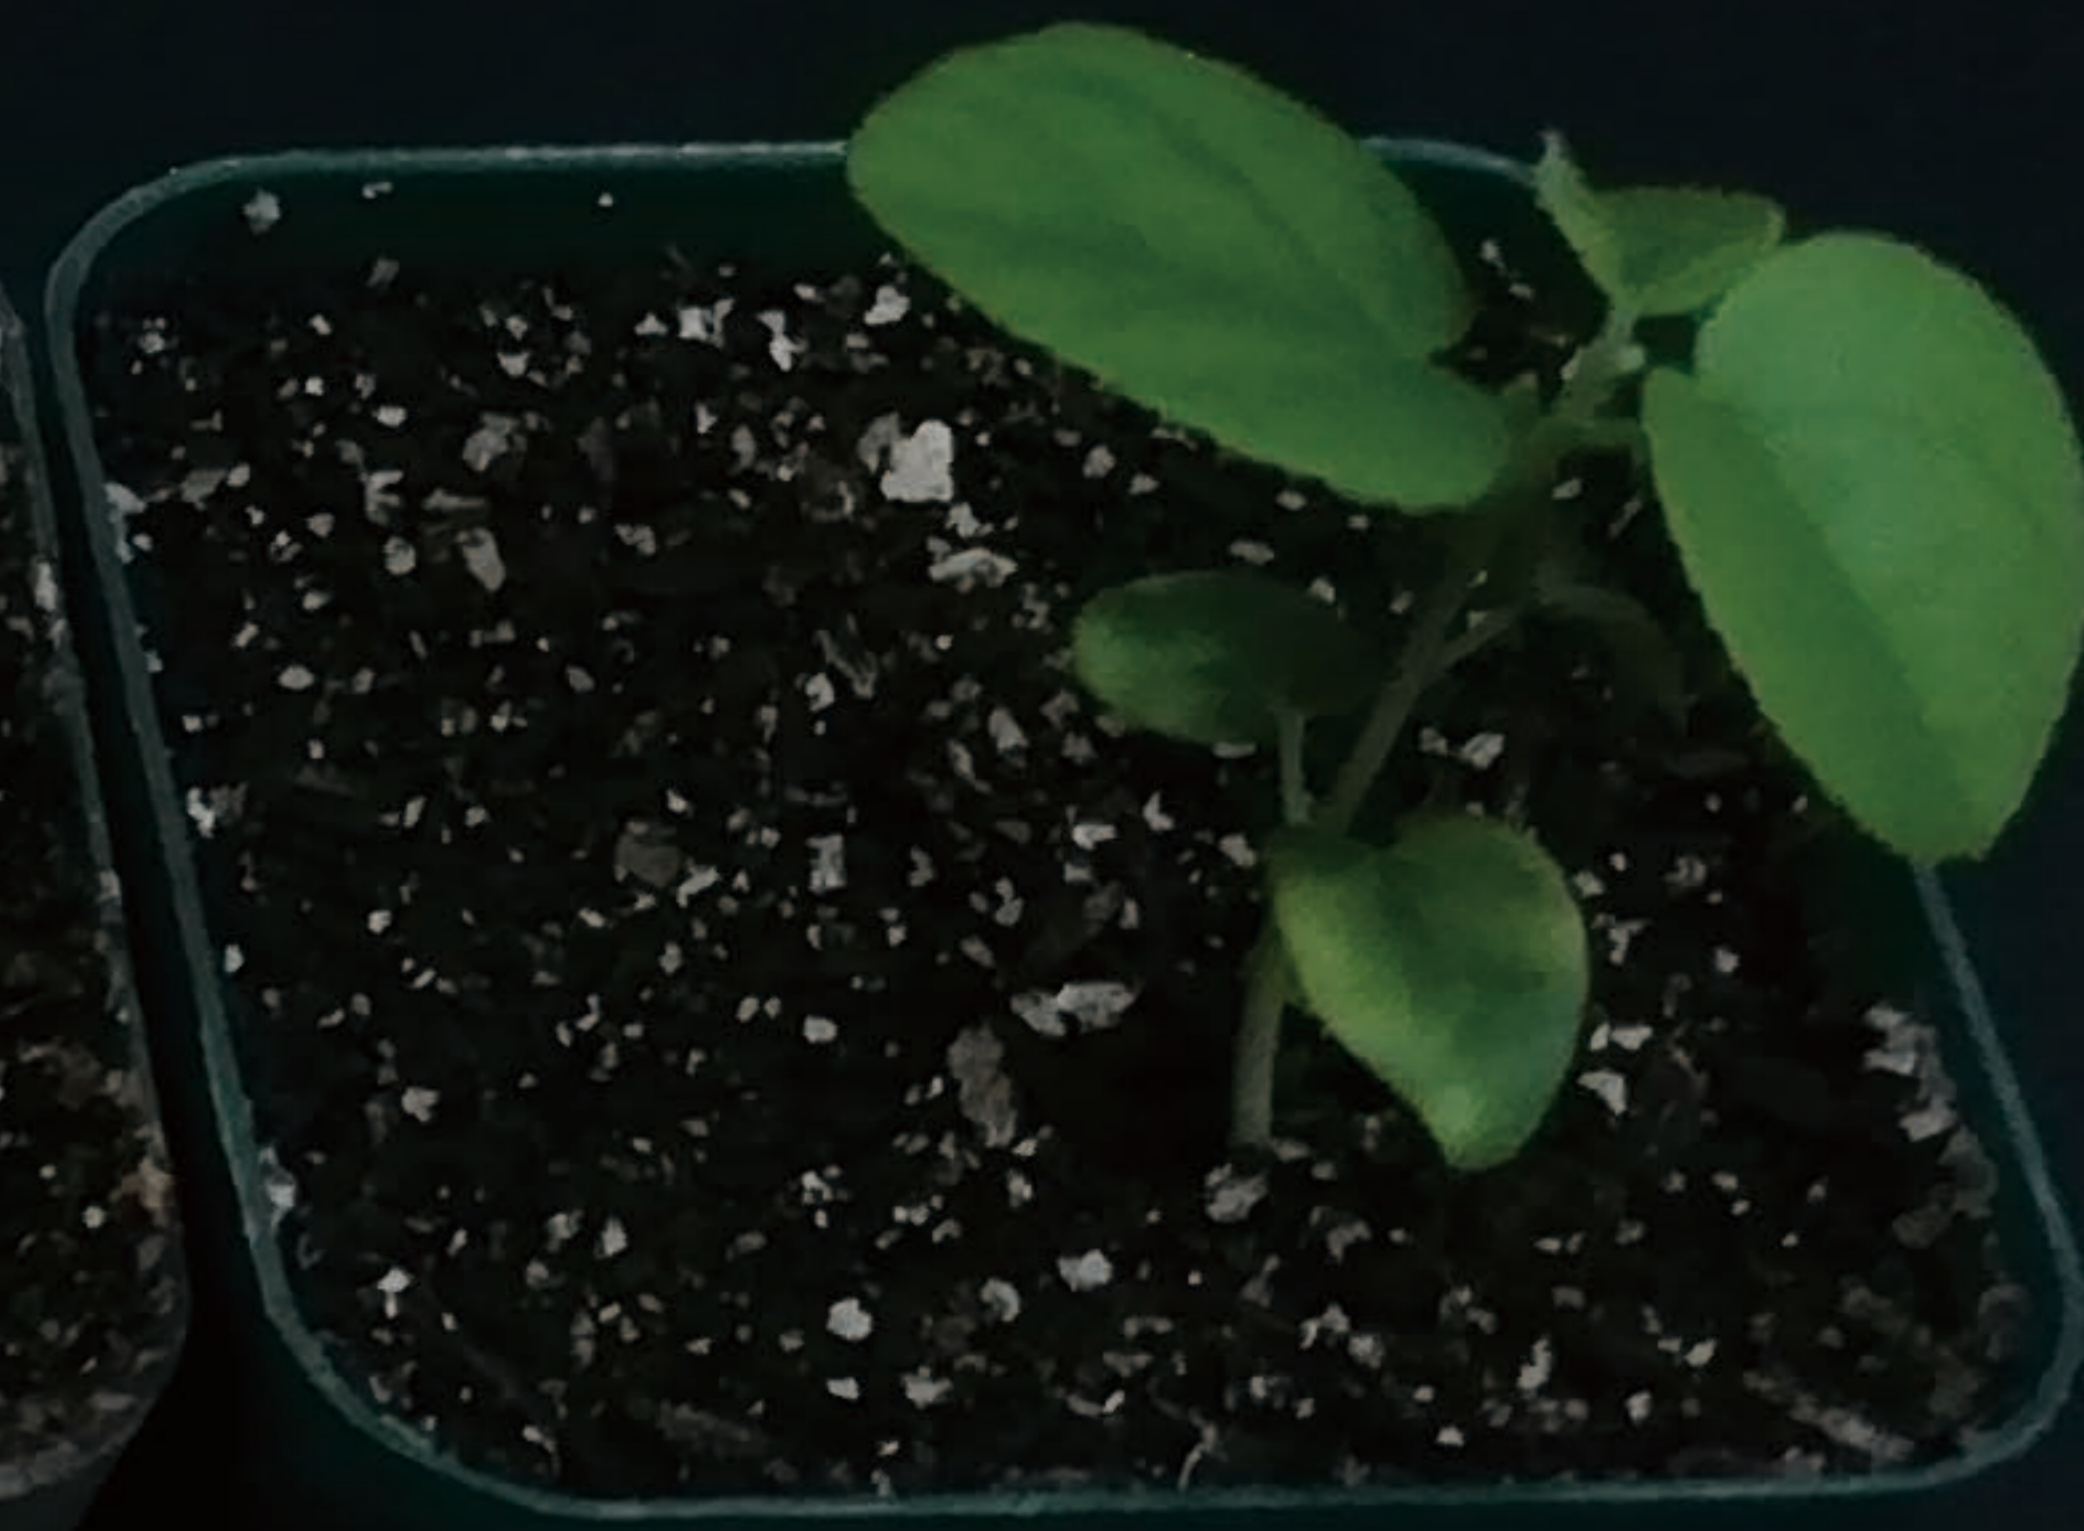

TRV2

C

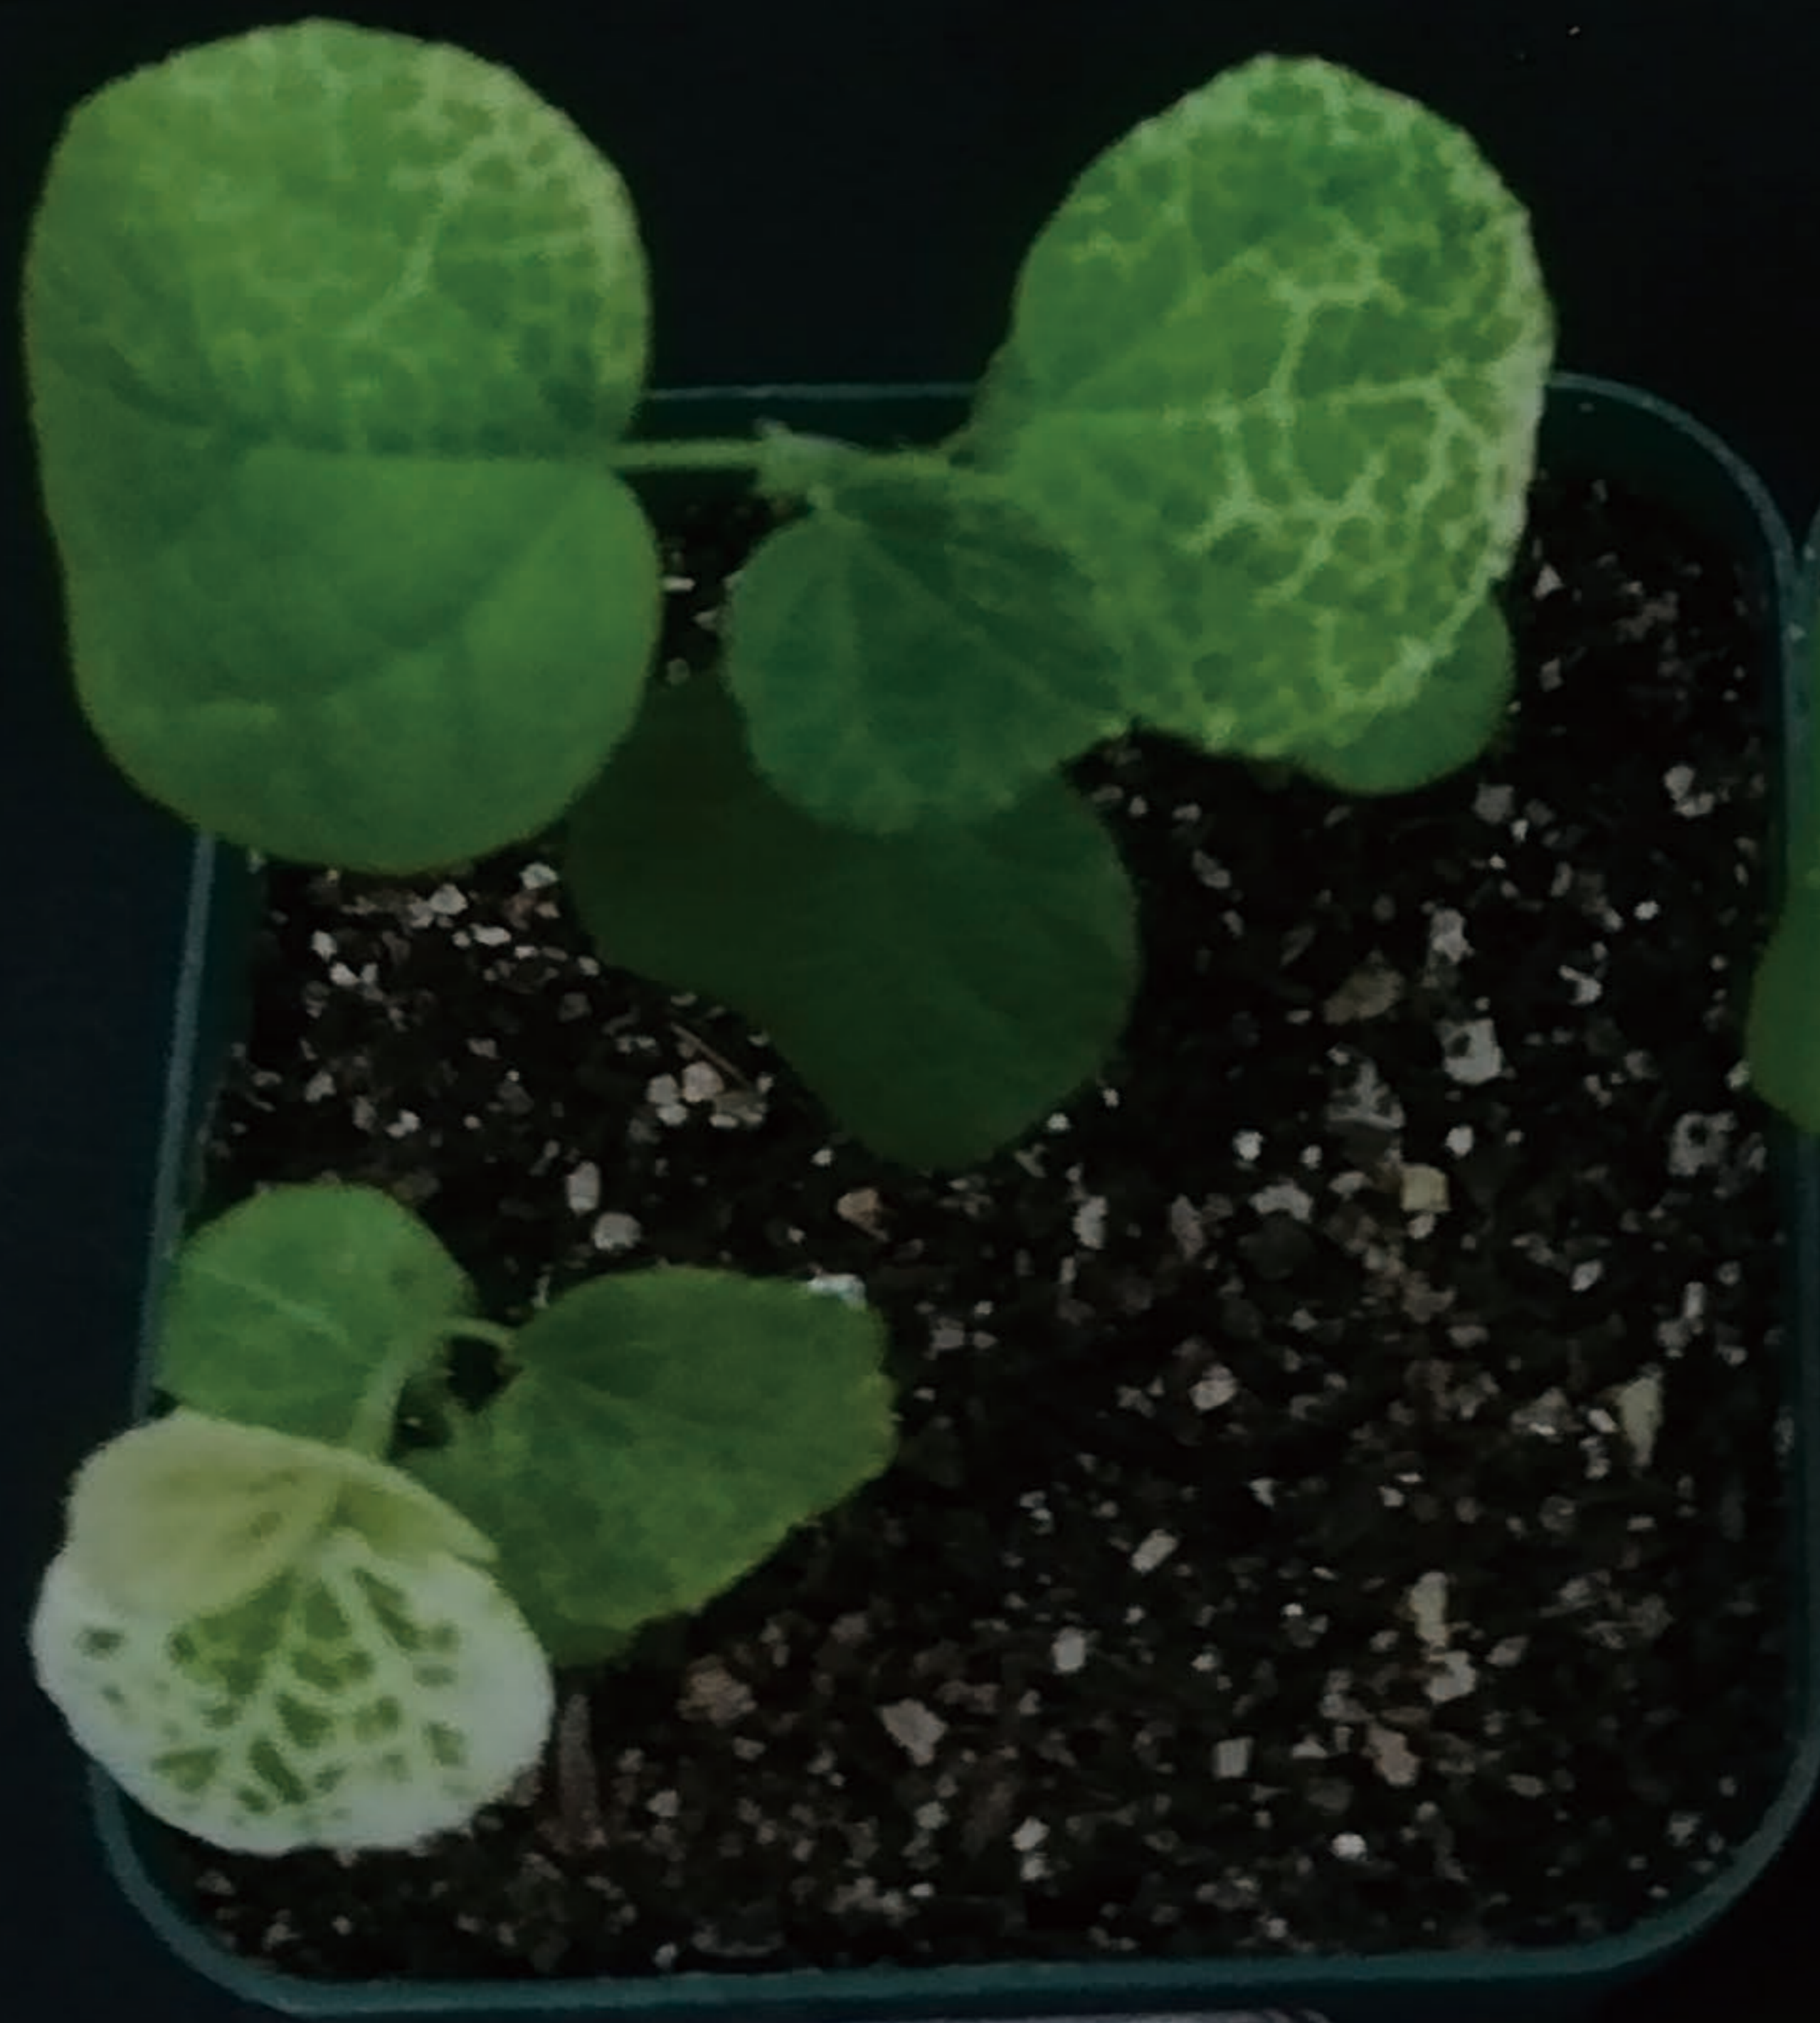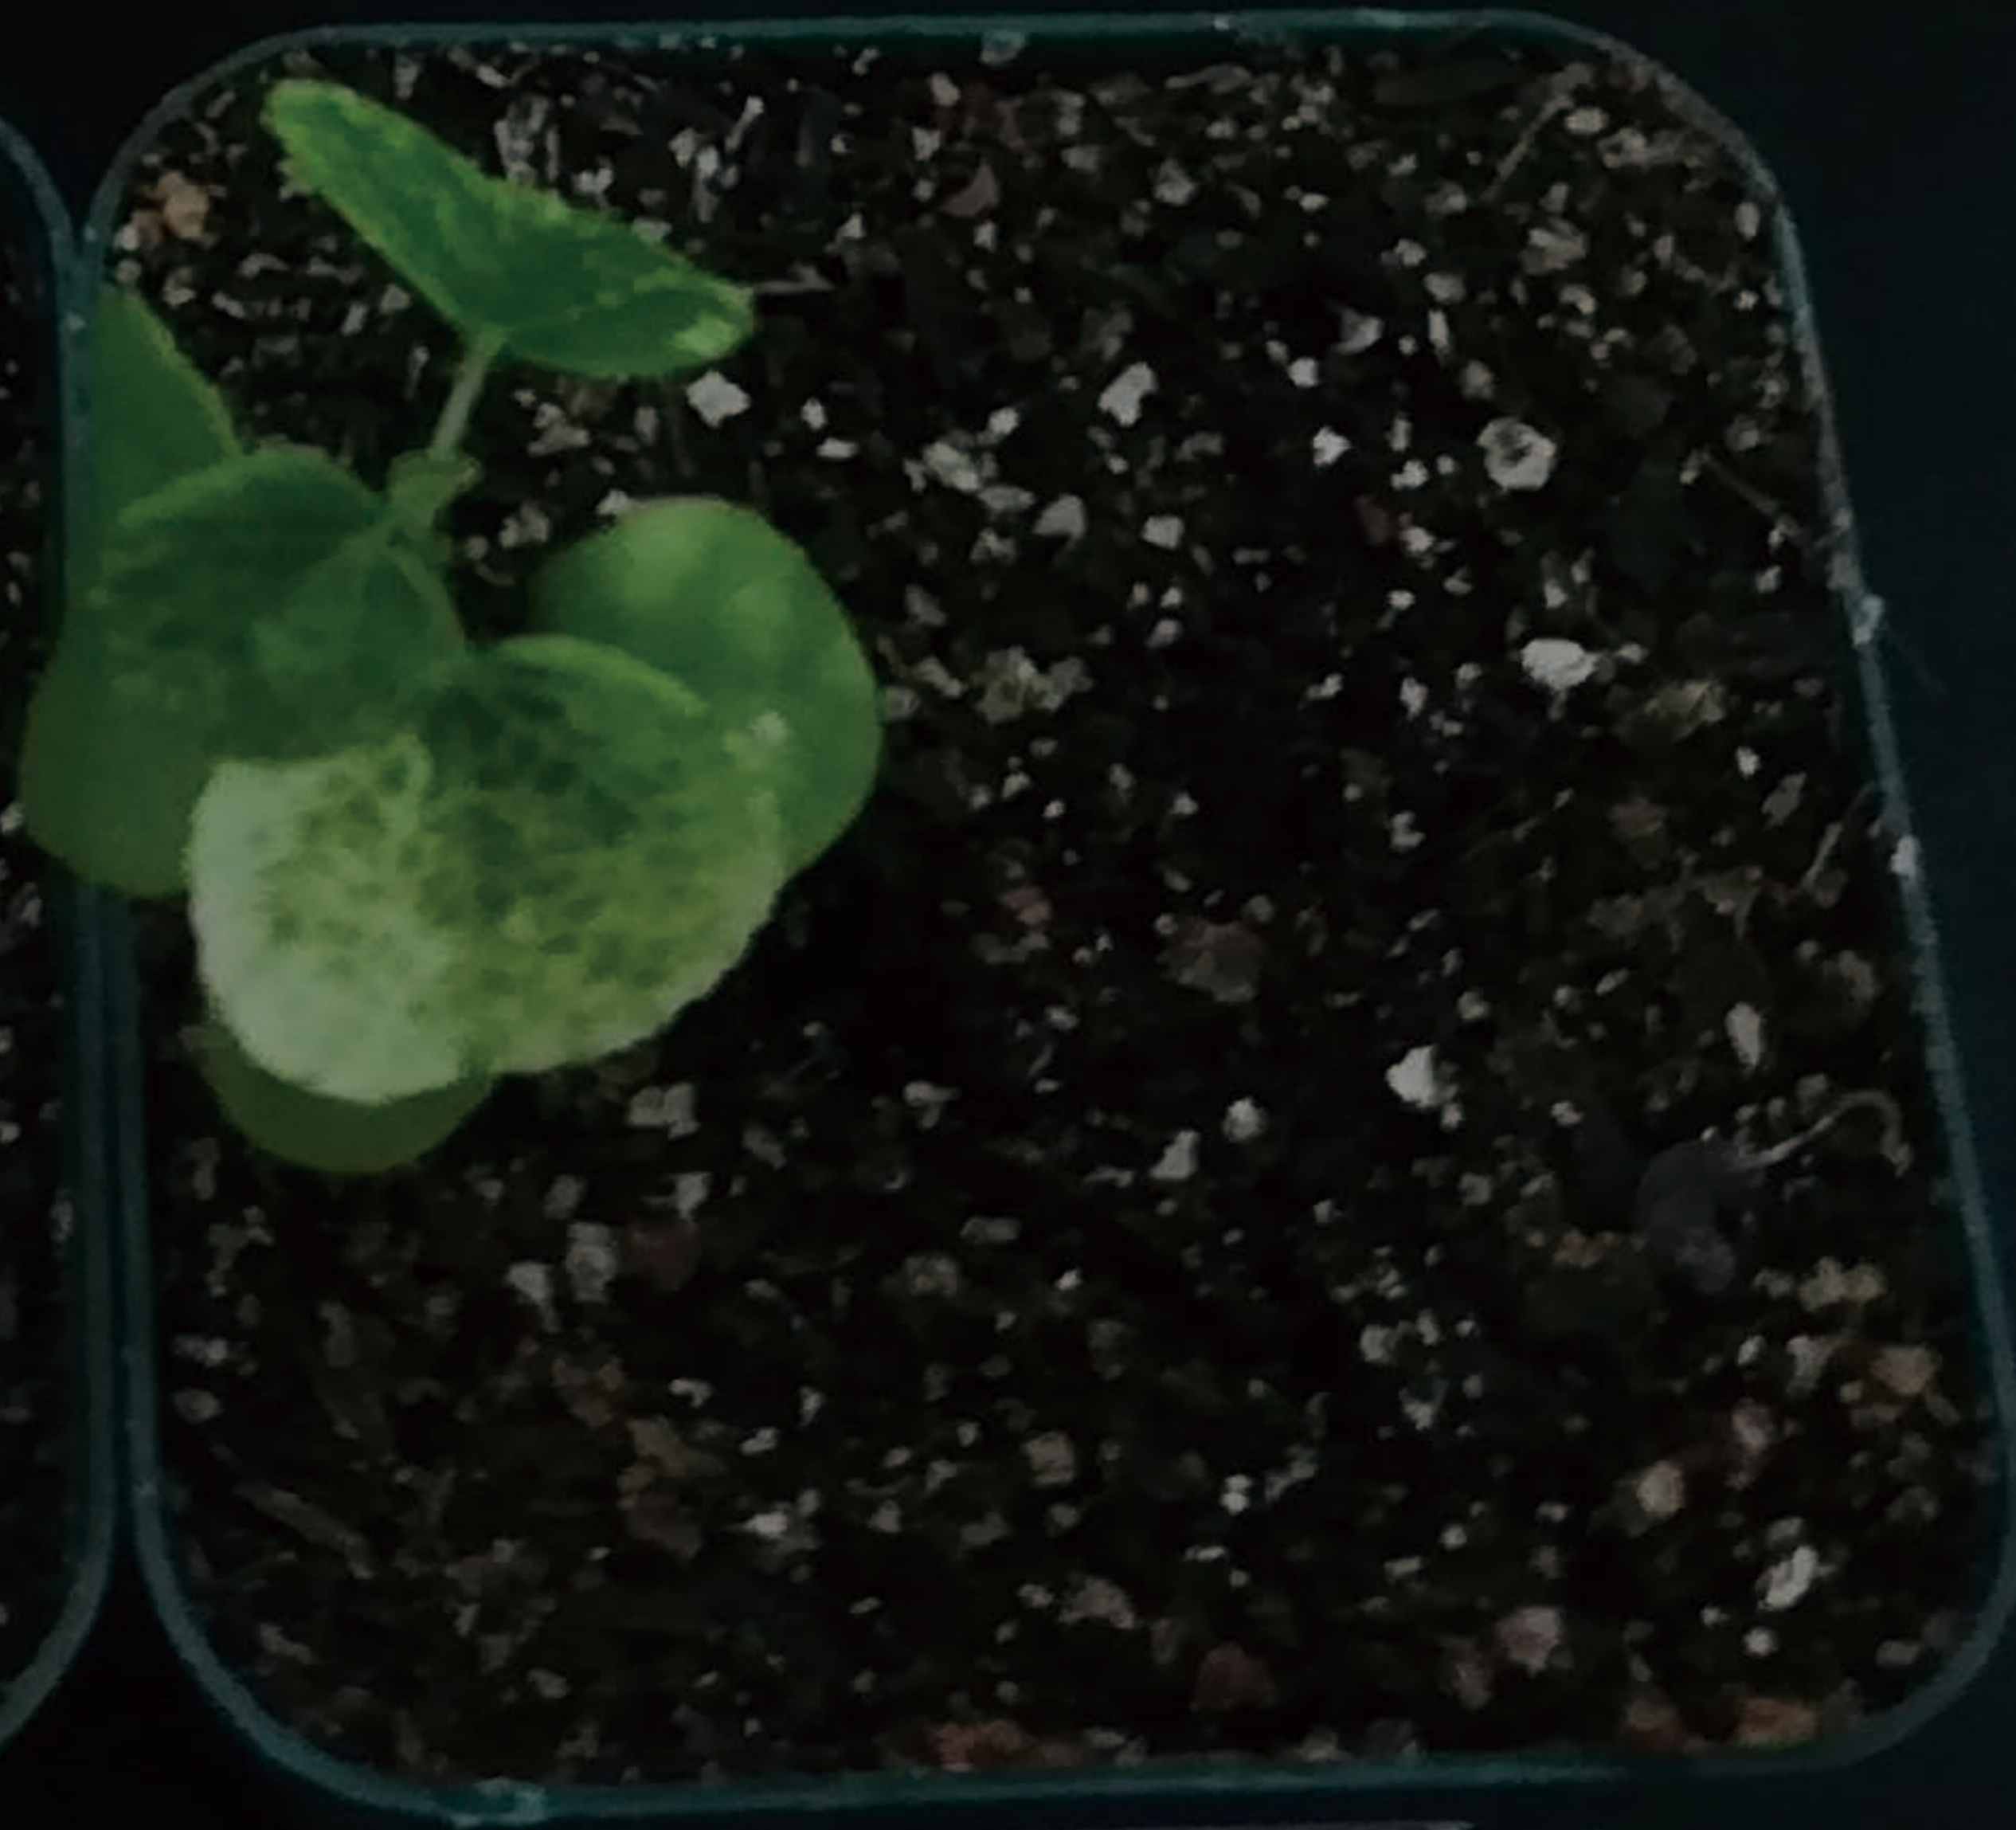

Supplement: Fig_S2.pdf [file Fig_S2.pdf]
